# Supplementary material for: Exosomal Leucine-Rich-Alpha2-Glycoprotein 1 Derived from Non-Small-Cell Lung Cancer Cells Promotes Angiogenesis via TGF-β Signal Pathway
Source: PubMed Central journal article supplement — Mol Ther Oncolytics. 2019 Aug 7;14:313–22. doi: 10.1016/j.omto.2019.08.001 (PMC6739429; doi:10.1016/j.omto.2019.08.001), 2019-08-07
Supplement: mmc1.pdf [file mmc1.pdf]

**OMTO, Volume 14**

**Supplemental Information**

**Exosomal Leucine-Rich-Alpha2-Glycoprotein 1**

**Derived from Non-Small-Cell Lung Cancer Cells**

**Promotes Angiogenesis via TGF- $\beta$  Signal Pathway**

**Zifan Li, Chao Zeng, Qiaohong Nong, Feihu Long, Jixian Liu, Zhimin Mu, Baokun Chen, Da Wu, and Hao Wu**

## Supplementary Materials

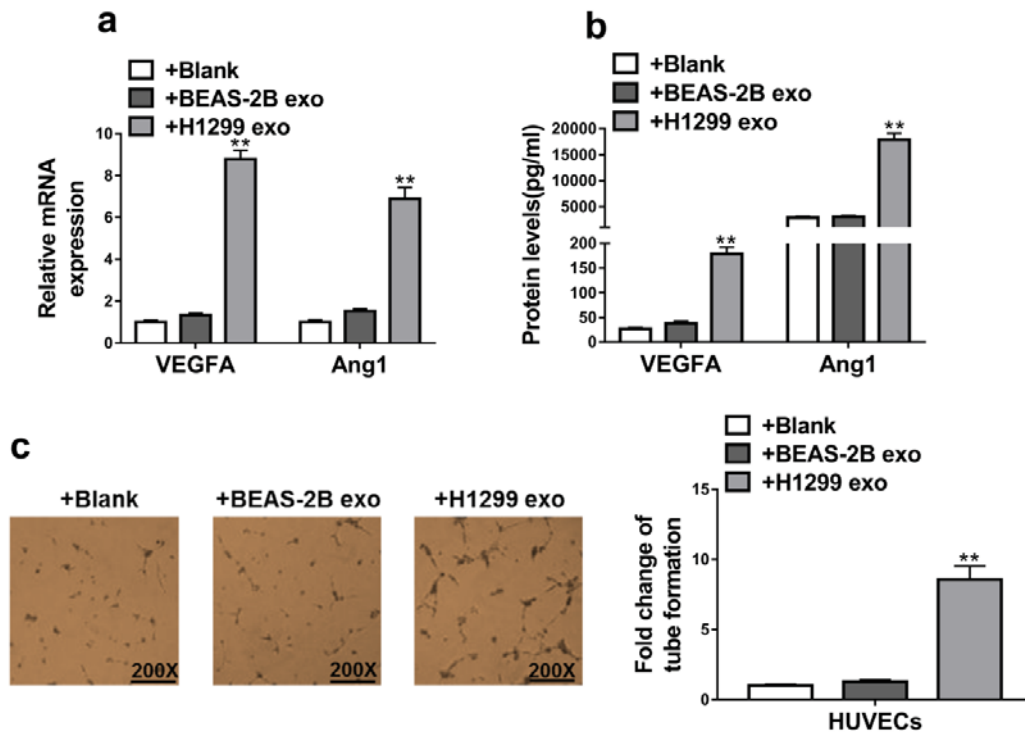

Figure S1. (a) The mRNA levels of proangiogenic factors VEGFA and Ang1 in HUVEC cells were determined by qRT-PCR. HUVEC cells were exposed to BEAS-2B cell-derived exosomes (+BEAS-2B exo) or H1299 cell-derived exosomes (+H1299 exo) or alone (Blank) for 48 h. (b) The protein levels of proangiogenic factors VEGFA and Ang1 in conditioned media of HUVEC cells were determined by ELISA. HUVEC cells were exposed to BEAS-2B cell-derived exosomes (+BEAS-2B exo) or H1299 cell-derived exosomes (+H1299 exo) or alone (Blank) for 48 h. (c) Representative images show the tube formation of HUVEC cells after the same exposure of corresponding exosomes. \* $P < 0.05$ ; \*\* $P < 0.01$ .

**Table S1.** Correlation of LRP1 expression with clinicopathological features in 100 NSCLC patients.

| Variables       | Expression of LRP1 |            | P value |
|-----------------|--------------------|------------|---------|
|                 | Low (%)            | High (%)   |         |
| Age             |                    |            | 0.6870  |
| <60             | 21(47.73%)         | 23(52.27%) |         |
| ≥60             | 29(51.79%)         | 27(48.21%) |         |
| Gender          |                    |            | 0.3093  |
| Male            | 27(45.76%)         | 32(54.24%) |         |
| female          | 23(56.10%)         | 18(43.90%) |         |
| Smoking status  |                    |            | 0.4177  |
| No              | 19(45.24%)         | 23(54.76%) |         |
| Yes             | 31(53.45%)         | 27(46.55%) |         |
| Tumor size (cm) |                    |            | 0.0156  |
| <3              | 34(60.71%)         | 22(39.29%) |         |
| ≥3              | 16(36.36%)         | 28(63.64%) |         |
| TNM staging     |                    |            | 0.0193  |
| I               | 22(66.67%)         | 11(33.33%) |         |
| II-IV           | 28(41.79%)         | 39(58.21%) |         |
